# Supplementary material for: A combination of molecular and clinical parameters provides a new strategy for high-grade serous ovarian cancer patient management
Source: Springer Nature journal article supplement (doi:10.1186/s12967-022-03816-7), 2022-12-21

# Supplementary Figure 1

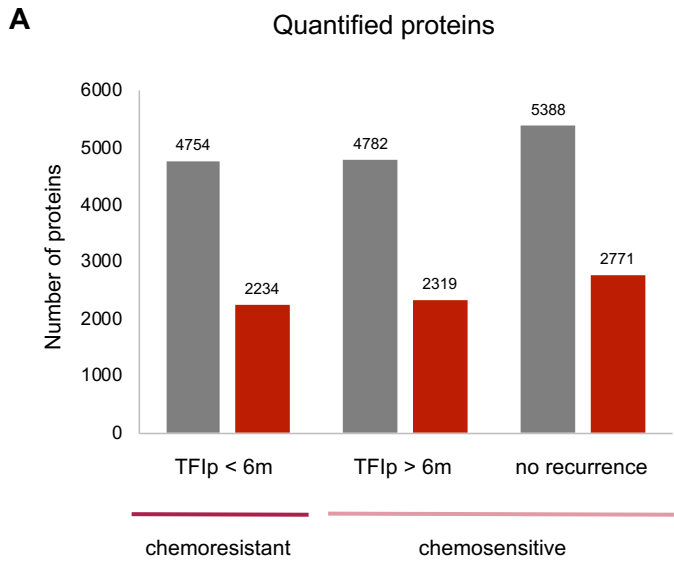

█ Total quantified  
█ Quantified in at least 4 out of 7 samples

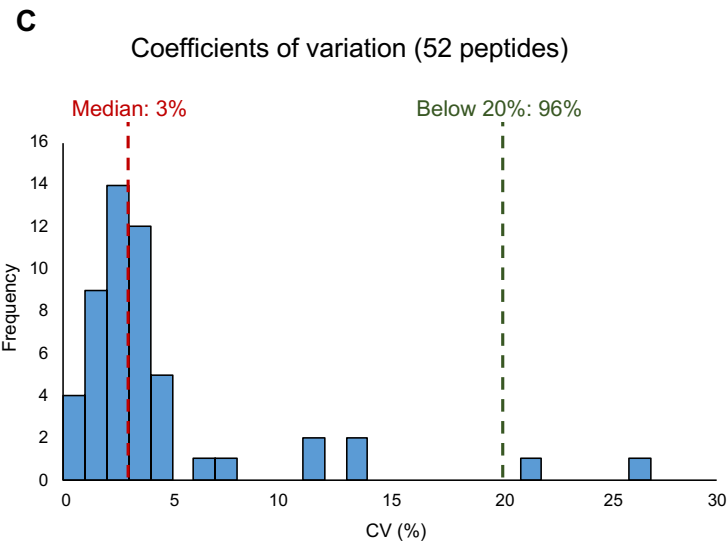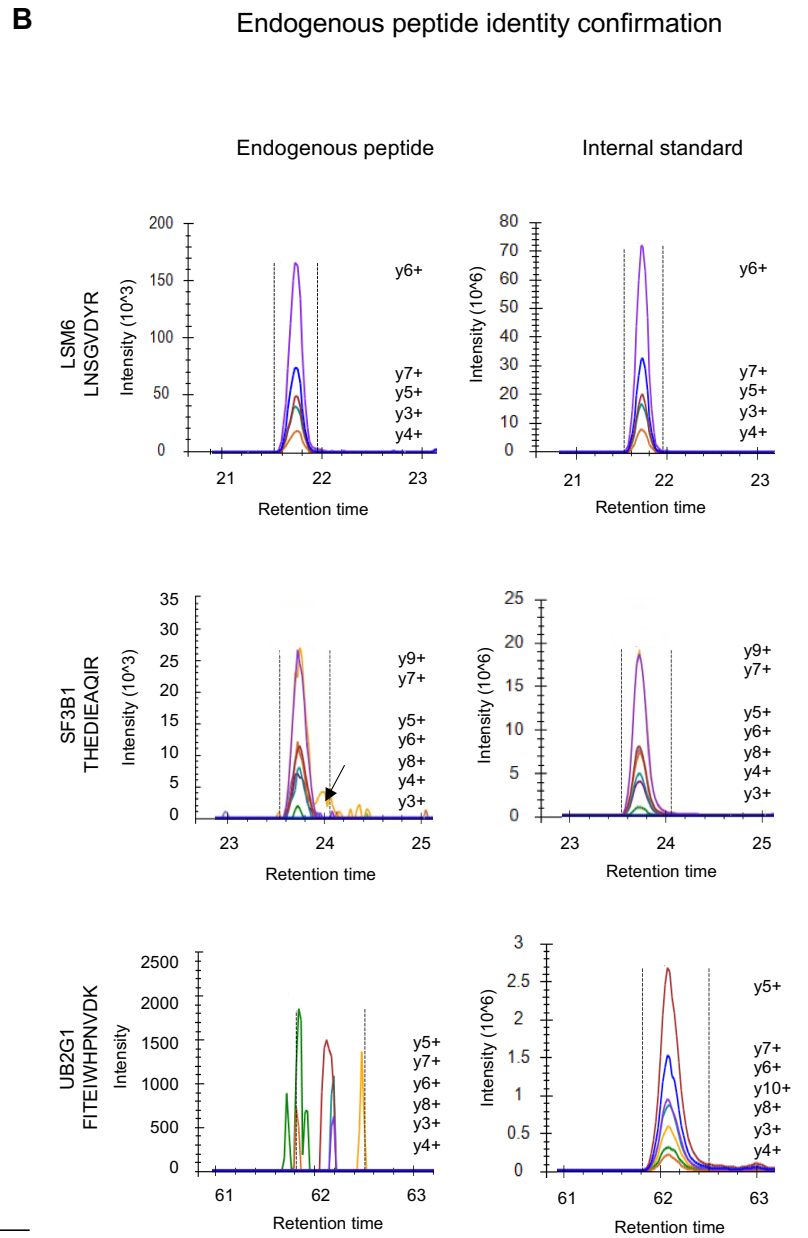

Supplement: MOESM4 [file 23849854]
