# Supplementary material for: A combination of molecular and clinical parameters provides a new strategy for high-grade serous ovarian cancer patient management
Source: Springer Nature journal article supplement (doi:10.1186/s12967-022-03816-7), 2022-12-21

## Supplementary Figure 2

### A Peptide retention times

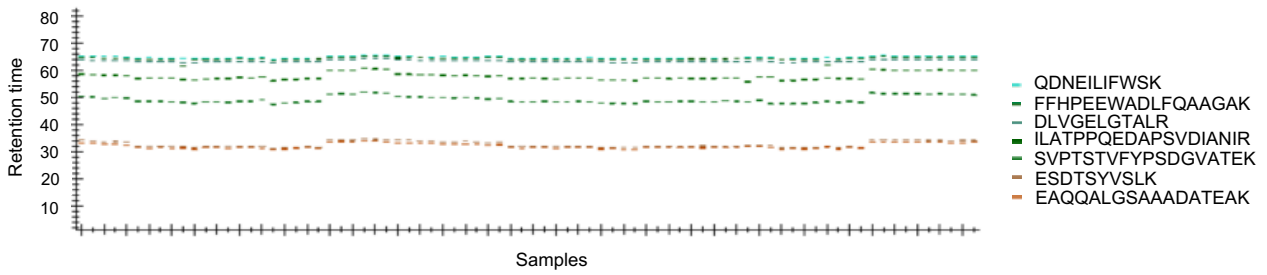

### B Chemoresistant (TFIp < 6m) vs chemosensitive (TFIp > 6m)

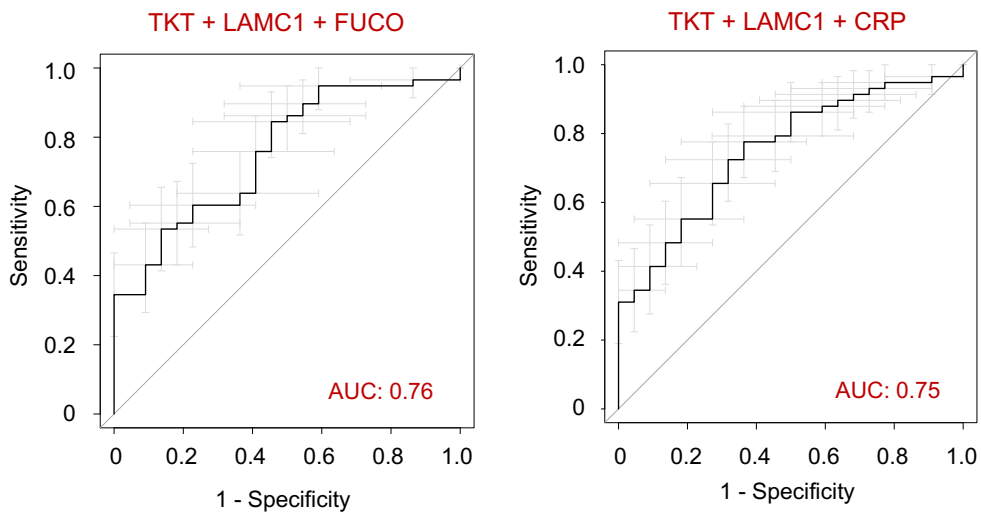

### C Chemoresistant (TFIp < 6m) vs partially chemosensitive (TFIp 6 – 12m)

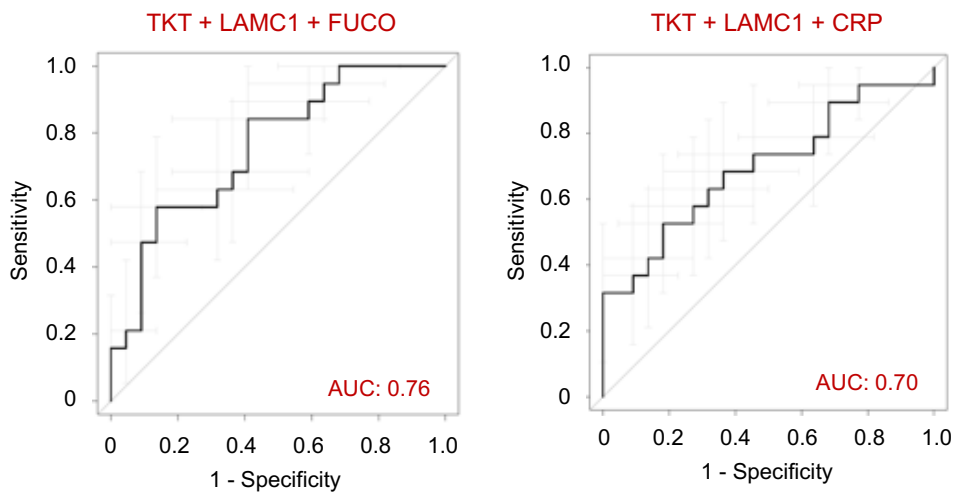

Supplement: MOESM8 [file 23849854]
