# Supplementary material for: A combination of molecular and clinical parameters provides a new strategy for high-grade serous ovarian cancer patient management
Source: J Transl Med. 2022 Dec 21;20:611. doi: 10.1186/s12967-022-03816-7 (PMC9773449; doi:10.1186/s12967-022-03816-7)
Supplement: Supplementary file 6 — Additional file 6: Table S5. Quantitative values (log2 areas) per protein and patient used in the prediction analysis. [file 12967_2022_3816_MOESM6_ESM.xlsx]

## Sheet: Sheet1
Supplementary Table 5. Quantitative Values (Log2 Areas) Per Protein And Patient Used In The Prediction Analysis.
PATIENT CODE	TYPE	O00584_RNT2_ELDLNSVLLK	O14910_LIN7A_ATVAAFAASEGHSHPR	O15551_CLD3_STGPGASLGTGYDR	O75533_SF3B1_THEDIEAQIR	P02741_CRP_ESDTSYVSLK	P04066_FUCO_DLVGELGTALR	P04350_TBB4A_INVYYNEATGGNYVPR	P06493_CDK1_SPEVLLGSAR	P07093_GDN_ASAATTAILIAR	P11047_LAMC1_EAQQALGSAAADATEAK	P12955_PEPD_IDEPGLR	P19823_ITIH2_IQPSGGTNINEALLR	P23526_SAHH_VADIGLAAWGR	P28062_PSB8_ASAGSYISALR	P29401_TKT_ILATPPQEDAPSVDIANIR	P35269_T2FA_LDTGPQSLSGK	P37840_SYUA_TVEGAGSIAAATGFVK	P47928_ID4_TPLTALNTDPAGAVNK	P58107_EPIPL_ALQQGLVGLELK	P62253_UB2G1_TELQSALLLR	P62312_LSM6_GNNVLYISTQK	Q8IXB1_DJC10_ILYDILAFAK	Q8IXM2_BAP18_VYEDSGIPLPAESPK	Q8N5K1_CISD2_DSLINLK	Q8N6H7_ARFG2_EVDAEYEAR	Q8WUY1_THEM6_LLEPFEVR	Q99733_NP1L4_VLAALQER	Q9H7E9_CH033_LPGPVSSAR	Q9UNS2_CSN3_ASALEQFVNSVR
91_Less6m	Less6m	15.734	17.956	12.679	15.809	11.804	17.917	13.609	14.137	18.056	16.986	17.785	15.992	18.087	19.38	18.007	15.603	17.985	11.795	12.783	16.735	21.123	11.291	14.319	17.083	16.935	18.503	19.313	17.988	15.979
4_Less6m	Less6m	19.628	18.895	18.74	18.135	15.087	19.659	14.484	20.455	19.706	14.666	19.576	17.419	18.916	21.06	17.839	16.844	15.85	14.92	17.667	17.929	21.678	12.83	14.722	18.162	18.887	19.702	19.441	18.641	16.363
7_Less6m	Less6m	21.038	19.917	19.178	18.463	17.192	21.653	11.85	20.898	19.708	16.718	21.005	17.781	20.8	23.742	21.008	16.641	19.292	16.489	15.335	18.983	23.173	14.764	17.15	18.859	19.728	19.067	21.742	19.112	19.168
10_Less6m	Less6m	15.863	18.346	11.825	16.78	14.22	17.195	12.659	15.226	22.25	17.083	18.488	17.628	18.03	19.416	18.188	14.279	16.708	12.525	10.071	16.923	20.316	10.72	11.87	14.494	17.743	15.28	18.915	17.287	15.737
13_Less6m	Less6m	17.624	18.286	17.247	17.367	22.615	19.863	10.566	17.193	20.193	17.48	19.548	18.618	19.445	21.637	18.873	16.174	18.31	13.122	14.117	17.814	20.396	12.676	13.41	19.294	18.644	19.568	19.591	17.791	16.77
93_Less6m	Less6m	17.31	17.321	16.934	16.182	20.396	18.978	13.385	17.474	16.508	16.218	19.404	16.92	19.856	19.027	18.35	15.072	14.427	9.769	15.86	17.127	19.704	11.908	10.967	17.096	18.229	20.037	17.53	14.965	15.874
22_Less6m	Less6m	20.073	18.059	19.747	17.974	17.663	20.023	14.189	20.784	15.948	15.776	19.599	18.968	21.276	22.042	20.918	16.826	18.215	13.424	18.197	17.397	20.102	14.834	14.421	17.87	18.626	21.201	20.058	18.725	18.711
28_Less6m	Less6m	22.996	19.731	20.175	18.923	11.482	20.414	8.513	21.564	19.929	15.988	19.091	15.534	21.649	23.72	20.328	17.646	12.673	15.698	17.32	19.68	22.793	16.475	15.919	19.558	18.662	21.56	20.62	19.602	18.699
31_Less6m	Less6m	15.617	12.483	17.242	14.866	16.654	15.119	8.133	17.008	12.064	11.647	15.065	13.188	15.503	18.647	13.951	12.01	11.274	8.025	7.802	15.097	19.713	8.247	9.932	14.867	15.105	16.347	16.855	13.971	7.578
34_Less6m	Less6m	19.194	17.613	15.628	17.69	15.944	17.963	14.651	19.309	17.283	14.752	18.657	19.403	18.397	19.326	17.62	16.749	15.629	12.005	15.647	18.116	20.136	13.993	14.436	16.513	17.381	15.054	19.633	16.724	16.651
37_Less6m	Less6m	18.899	17.565	16.93	16.243	22.572	19.775	14.297	19.458	17.345	15.548	19.67	18.084	19.455	22.347	20.14	15.162	17.909	12.22	14.68	16.825	20.62	13.583	12.967	17.553	17.161	18.884	19.112	16.568	17.816
40_Less6m	Less6m	15.991	19.374	17.551	18.687	11.036	17.969	15.578	19.884	19.945	15.271	19.812	15.7	18.483	18.067	17.139	16.966	14.039	14.216	16	18.693	19.725	11.618	13.774	17.121	19.5	17.468	18.722	18.64	16.988
43_Less6m	Less6m	17.455	16.932	16.044	15.097	17.361	18.979	10.466	14.794	18.422	15.754	18.395	18.62	18.35	20.953	19.907	13.787	17.581	9.763	10.644	15.995	18.922	13.029	12.125	16.56	15.695	17.217	18.262	15.388	17.478
58_Less6m	Less6m	18.609	17.96	18.067	17.578	19.823	19.507	10.852	16.799	18.555	16.431	19.302	17.809	18.125	19.146	19.11	15.579	18.025	10.04	13.658	17.583	19.271	13.982	12.325	14.62	17.284	16.664	18.889	16.53	18.529
61_Less6m	Less6m	19.889	19.012	15.433	17.253	14.515	19.494	13.367	19.116	20.964	16.795	19.726	19.214	19.399	20.271	20.892	15.165	17.321	14.212	14.721	17.942	21.199	14.659	14.453	16.893	13.029	18.675	19.842	18.265	18.616
64_Less6m	Less6m	16.675	19.306	14.261	18.551	19.91	18.075	11.817	20.667	18.889	16.922	19.995	19.282	20.233	21.946	20.74	17.365	17.456	10.493	13.466	18.158	20.528	13.87	14.807	19.733	18.737	20.74	19.831	17.901	18.327
94_Less6m	Less6m	17.787	18.175	17.206	17.977	16.565	19.966	9.488	19.027	17.413	16.442	18.534	18.187	18.565	20.172	19.035	16.203	15.411	13.237	13.984	18.089	21.186	12.168	14.161	17.377	17.075	19.684	19.824	17.154	17.976
73_Less6m	Less6m	19.336	18.083	19.338	16.953	19.639	19.791	11.045	19.953	18.584	15.563	19.318	18.498	20.345	22.029	20.321	16.122	18.511	11.291	16.753	16.465	20.252	16.285	13.79	18.748	17.668	21.181	19.553	16.729	18.797
88_Less6m	Less6m	21.123	19.675	18.058	19.587	13.603	19.601	17.633	22.17	15.687	16.38	21.088	16.108	20.17	19.335	20.601	17.08	16.577	16.901	16.619	20.557	21.408	14.947	15.959	17.874	18.784	16.985	21.429	19.514	19.808
100_Less6m	Less6m	16.604	17.415	16.519	17.131	16.41	18.261	14.552	18.313	19.246	15.286	18.339	14.313	17.837	18.334	17.481	15.718	15.783	12.243	14.486	18.066	19.705	11.821	13.994	16.55	16.638	16.123	18.348	16.511	16.866
105_Less6m	Less6m	18	17.402	16.803	16.919	17.999	20.229	14.018	17.856	18.357	14.963	18.861	16.053	18.673	18.77	18.907	13.381	15.909	9.98	14.468	17.516	19.332	12.189	12.394	15.775	16.205	15.674	18.047	16.088	18.203
70_Less6m	Less6m	14.893	18.033	12.595	16.036	17.98	15.818	13.99	12.295	18.577	17.396	19.52	17.053	16.694	18.134	19.919	14.934	17.149	7.554	10.57	16.296	16.725	11.887	12.104	16.839	14.682	16.68	18.14	16.161	17.098
52_More6m	More6m	19.89	18.62	18.537	18.578	20.967	21.248	15.936	19.48	18.047	16.729	21.06	18.427	21.451	24.202	22.305	17.381	15.944	11.737	13.958	18.645	21.671	15.536	15.1	19.467	19.055	20.556	21.457	18.305	19.647
19_More6m	More6m	20.796	19.002	18.541	18.63	21.756	21.303	10.816	21.098	18.352	16.387	20.261	18.872	21.821	22.438	21.762	17.864	18.858	14.491	16.155	17.89	21.042	16.982	15.032	18.149	18.234	20.443	20.744	18.179	19.722
49_More6m	More6m	18.741	19.023	19.573	18.701	22.736	20.733	13.82	19.468	18.744	18.158	20.397	20.131	21.208	22.043	21.441	16.922	19.199	14.138	15.437	18.488	20.902	13.837	15.707	20.017	18.656	21.346	20.228	18.641	18.941
67_More6m	More6m	16.643	17.908	15.182	18.183	13.672	14.857	7.814	20.743	13.705	11.776	17.193	12.416	17.773	21.491	15.099	15.323	17.555	8.991	12.062	17.094	19.879	10.546	12.509	17.721	17.508	19.821	18.148	17.351	14.849
79_More6m	More6m	20.553	18.844	19.598	18.01	16.892	20.272	13.641	21.579	17.816	16.672	20.543	20.119	21.588	22.885	22.084	17.289	17.982	14.107	16.08	18.248	21.086	15.598	15.202	19.264	18.972	20.997	20.586	17.807	20.043
85_More6m	More6m	19.583	19.39	19.727	18.61	14.876	19.702	14.059	20.221	20.334	16.896	20.859	16.895	19.003	19.727	20.057	15.317	16.951	14.794	16.159	19.672	21.144	13.629	14.667	14.577	19.224	17.211	20.43	18.131	19.669
2_More6m	More6m	20.203	17.818	18.873	17.242	15.67	18.528	16.114	20.014	17.17	14.817	20.136	17.998	19.631	20.622	19.039	16.987	13.941	15.621	16.266	16.613	21.026	12.696	15.289	17.068	18.396	19.11	19.781	17.345	15.768
5_More6m	More6m	15.652	15.689	13.09	16.103	21.512	17.079	9.576	15.936	17.106	16.542	17.848	17.994	17.508	19.514	17.64	14.694	17.244	9.477	12.109	15.804	18.29	11.204	13.251	17.609	16.86	18.181	17.747	15.461	14.65
8_More6m	More6m	16.569	19.959	18.207	18.473	16.456	18.17	15.752	20.166	20.257	16.376	20.362	17.233	21.686	22.424	21.746	17.389	14.57	14.874	16.484	16.847	21.286	10.98	16.015	17.727	20.168	22.598	20.384	20.291	16.67
11_More6m	More6m	17.208	17.461	17.258	16.64	19.627	18.893	10.985	19.052	18.606	15.502	18.565	18.327	19.61	22.007	18.83	15.642	18.761	14.005	13.575	16.537	19.921	12.865	14.105	17.893	18.11	20.057	18.728	17.438	16.64
14_More6m	More6m	21.388	19.854	20.36	18.767	19.863	20.915	12.854	21.187	19.831	17.335	21.077	21.003	22.466	24.286	21.977	17.925	20.565	15.059	17.793	19.146	21.904	16.011	16.205	20.777	20.59	22.942	21.836	19.284	19.061
17_More6m	More6m	19.186	17.53	17.808	16.648	16.411	19.258	12.312	19.898	17.886	15.735	19.252	20.06	20.374	22.221	20.165	16.158	19.057	11.561	14.194	16.955	20.193	14.051	14.605	17.578	17.741	20.304	19.705	16.722	17.98
20_More6m	More6m	19.415	17.913	18.561	17.56	17.056	22.448	15.287	17.467	19.983	15.192	20.936	18.492	20.365	23.677	21.304	16.64	17.848	10.719	16.723	17.717	21.226	14.838	15.12	19.187	18.722	20.867	20.253	17.252	18.47
23_More6m	More6m	20.28	18.985	18.916	18.394	21.075	20.413	16.552	21.109	19.107	16.427	19.941	18.94	21.288	21.853	21.407	18.69	18.036	13.717	16.484	17.926	21.196	16.03	15.447	18.719	18.582	20.597	20.445	18.731	19.231
26_More6m	More6m	18.978	18.3	15.038	16.562	11.363	19.762	13.151	16.299	20.431	16.947	18.851	17.596	18.933	21.114	20.417	15.995	17.729	11.697	14.181	17.587	20.843	14.041	13.624	16.999	16.962	18.116	19.721	18.475	18.268
32_More6m	More6m	13.96	16.825	12.472	15.889	18.541	14.162	10.362	14.633	17.205	15.686	17.391	14.019	16.58	17.093	15.168	14.102	12.596	9.222	8.052	14.896	18.666	7.599	10.937	15.318	16.51	15.878	17.743	16.055	7.783
35_More6m	More6m	16.271	18.129	15.503	17.247	16.085	19.014	16.486	16.777	18.633	17.118	19.436	18.539	18.004	19.891	19.188	15.416	17.186	11.22	14.503	18.393	19.751	11.468	13.813	17.157	17.724	16.701	19.182	16.608	16.634
38_More6m	More6m	18.378	18.709	16.418	16.148	14.593	16.94	12.695	19.579	16.084	12.804	18.376	16.654	18.333	19.957	19.704	15.42	11.578	14.022	14.27	16.616	19.7	11.079	11.281	15.658	17.562	19.252	18.231	20.286	17.065
103_More6m	More6m	15.825	18.607	18.591	17.504	20.005	19.085	9.188	19.44	19.788	15.485	18.742	17.081	18.09	18.923	19.187	15.489	16.041	14.53	15.523	17.542	20.46	13.047	13.92	17.223	17.14	17.785	18.366	18.826	18.587
44_More6m	More6m	19.436	18.232	16.256	17.114	15.191	19.992	11.722	20.118	18.453	15.076	19.794	16.788	20.657	20.34	20.751	16.948	15.453	15.188	14.847	17.516	20.324	15.277	12.916	16.451	17.266	17.752	20.454	16.253	17.883
95_More6m	More6m	19.816	18.93	18.739	17.804	17.085	20.795	12.627	20.552	17.298	14.721	20.096	17.773	20.896	23.116	21.086	16.741	15.416	14.74	17.161	18.564	21.627	15.749	15.758	18.61	18.339	21.01	19.905	18.495	19.291
53_More6m	More6m	12.05	16.026	11.714	15.214	12.642	12.91	11.242	7.422	18.73	15.652	17.251	13.214	15.768	14.808	17.347	13.328	14.461	7.879	8.092	14.788	15.76	10.808	8.894	13.484	13.781	13.542	16.085	16.035	16.173
56_More6m	More6m	16.58	17.559	16.571	17.266	19.08	18.237	14.485	17.727	19.039	16.486	19.189	18.089	19.547	21.2	20.517	15.803	18.387	15.031	9.256	17.345	19.211	12.3	13.88	18.253	16.451	18.755	18.731	17.46	18.069
59_More6m	More6m	17.923	18.297	15.312	14.898	12.273	16.022	10.969	20.169	17.003	14.261	18.161	16.234	17.503	19.889	18.887	15.138	15.036	10.784	11.208	14.845	18.483	12.73	10.842	14.909	16.681	18.438	17.166	17.866	17.453
62_More6m	More6m	16.321	16.453	16.684	16.569	13.196	17.945	12.962	19.898	12.852	14.198	17.314	15.689	18.544	19.967	19.246	14.988	15.056	11.782	12.846	16.352	18.057	13.73	12.566	16.107	15.631	18.874	18.401	16.129	17.23
68_More6m	More6m	18.866	18.541	17.384	18.107	11.241	18.392	8.027	16.208	18.745	13.885	18.707	15.475	19.052	17.877	17.725	15.561	13.207	13.691	14.166	18.289	19.872	10.425	13.755	14.805	18.384	17.79	18.921	18.543	17.924
96_More6m	More6m	19.886	18.721	17.786	17.876	17.765	19.727	13.217	18.968	17.208	14.876	19.383	18.857	18.381	20.904	19.098	16.277	16.62	14.066	15.659	17.893	21.732	14.698	14.494	18.205	17.114	18.859	19.238	17.979	18.005
104_More6m	More6m	11.793	15.55	17.624	14.625	14.695	18.181	8.025	15.487	15.689	8.199	16.201	11.933	16.666	18.957	18.059	14.262	10.337	8.443	12.653	14.303	17.494	8.327	10.466	15.991	16.383	18.238	16.238	15.01	13.464
74_More6m	More6m	20.737	18.959	19.401	17.929	18.345	20.49	16.178	19.703	18.544	17.621	20.653	18.003	20.51	22.517	21.784	16.041	18.585	14.161	15.837	18.452	21.567	16.16	14.511	18.437	16.761	19.29	20.359	18.226	20.618
77_More6m	More6m	17.826	20.342	17.575	19.456	14.901	19.332	15.822	21.487	20.966	16.981	21.829	17.901	20.281	21.681	22.15	17.796	17.535	16.358	13.915	19.567	21.328	14.322	16.036	19.508	16.788	19.457	20.917	19.718	19.793
80_More6m	More6m	21.434	19.004	14.806	18.379	14.617	20.524	16.596	19.772	17.61	15.505	20.361	18.345	18.838	16.261	19.918	15.664	16.115	16.745	16.164	19.361	20.734	13.97	14.733	15.791	16.051	15.84	21.492	19.25	19.251
101_More6m	More6m	17.397	15.913	7.623	14.422	17.88	17.902	10.245	13.831	15.612	15.184	17.03	17.264	18.018	20.23	19.189	14.01	17.176	10.491	10.163	15.391	18.361	13.304	11.075	16.263	15.321	17.263	17.636	14.723	18.039
86_More6m	More6m	17.943	19.088	13.956	18.052	7.903	18.895	13.721	16.552	20.19	16.757	19.847	19.282	19.359	18.371	18.901	13.235	16.436	13.23	16.756	18.417	19.477	12.043	14.593	8.962	17.673	14.537	19.568	16.754	18.571
89_More6m	More6m	17.695	18.867	13.182	17.116	18.317	19.564	14.604	15.396	21.086	17.454	20.095	19.13	20.482	22.637	21.594	15.41	17.383	13.864	10.563	18.049	21.671	14.143	13.783	17.443	17.676	19.037	20.158	18.485	20.23
92_More6m	More6m	16.755	18.648	14.578	17.143	16.463	19.013	15.154	15.126	20.39	16.011	19.567	17.36	18.884	19.884	19.712	14.317	17.401	13.313	13.492	17.825	20.548	11.373	13.922	16.127	15.59	17.306	19.132	17.732	17.583
18_More6m	More6m	18.536	18.005	17.455	16.176	16.059	18.991	12.341	19.413	19.308	17.723	18.504	19.433	18.604	19.856	19.385	14.842	15.936	13.735	12.891	16.304	19.285	14.907	12.476	16.751	17.315	16.47	19.401	16.376	17.216
48_More6m	More6m	22.701	19.635	17.831	18.557	18.958	20.063	16.256	20.776	18.874	16.133	20.133	18.243	20.383	20.198	22.05	18.034	16.971	17.149	15.873	18.69	21.97	17.006	13.531	18.054	18.708	18.193	21.994	19.284	19.636
54_More6m	More6m	17.685	21.106	16.691	19.13	17.284	19.952	13.502	22.233	21.542	17.453	21.667	18.001	20.593	20.423	22.099	18.241	17.695	15.463	10.289	19.234	21.171	14.8	13.833	17.878	18.267	17.611	20.99	20.055	19.415
3_NoRec	NoRec	20.515	19.167	19.145	18.301	11.852	21.153	12.062	21.131	19.064	15.717	19.228	17.46	20.36	21.924	20.355	17.28	16.991	16.34	16.054	18.561	21.123	15.15	15.689	17.828	18.481	19.107	19.995	19.37	18.93
6_NoRec	NoRec	17.552	16.414	18.419	16.127	21.696	17.518	10.372	17.477	17.683	15.483	17.816	18.541	18.361	20.688	17.891	15.534	17.866	12.479	13.573	14.789	18.293	12.624	13.214	18.177	16.687	18.757	18.469	16.116	15.542
9_NoRec	NoRec	20.961	18.742	17.975	18.159	13.412	19.965	12.81	21.276	18.229	15.891	21.119	20.07	19.557	22.123	20.072	16.454	16.606	13.061	16.094	18.63	20.995	14.587	14.911	17.682	18.602	17.435	21.427	17.695	18.352
12_NoRec	NoRec	20.212	20.02	18.204	18.847	20.093	20.581	11.235	22.231	19.777	16.965	20.248	18.671	19.538	22.202	19.946	17.207	16.728	14.94	16.917	18.881	22.146	15.875	16.025	18.502	18.746	19.144	20.375	17.442	18.146
15_NoRec	NoRec	14.717	19.283	17.515	18.046	7.8	16.065	12.441	21.361	19.156	17.212	21.709	19.374	19.571	20.15	20.426	17.87	7.452	10.774	11.476	18.447	18.816	11.764	12.039	16.344	17.264	17.274	18.601	19.042	17.901
21_NoRec	NoRec	17.47	18.57	14.787	17.068	15.436	18.526	10.303	16.633	19.82	15.22	18.467	18.422	17.733	18.923	18.531	15.244	15.969	11.74	13.331	17.327	20.144	12.042	13.852	16.855	17.341	17.311	18.873	17.682	16.404
24_NoRec	NoRec	12.598	16.021	11.986	14.574	13.606	15.024	10.04	13.342	18.527	14.068	17.238	14.754	17.059	19.157	17.558	12.122	15.918	8.088	9.336	14.387	18.296	11.161	10.192	14.797	14.984	17.523	17.382	15.783	11.223
27_NoRec	NoRec	19.797	19.939	19.858	19.616	13.142	21.486	17.936	23.432	16.928	14.992	21.761	18.255	21.666	24.326	21.306	18.143	14.342	15.261	18.268	20.351	22.934	14.777	16.742	19.602	19.866	21.7	21.948	20.612	19.351
30_NoRec	NoRec	22.535	19.894	19.582	19.758	19.631	21.794	16.919	23.071	16.519	16.22	22.093	17.835	21.442	23.445	22.337	18.538	16.979	17.671	12.854	21.158	23.616	16.59	17.272	19.212	19.484	20.304	21.398	17.511	19.824
36_NoRec	NoRec	21.274	18.172	17.805	18.578	10.641	20.698	10.237	18.391	17.962	16.432	18.849	17.039	18.886	19.828	18.063	16.904	16.59	14.074	14.102	19.167	21.159	13.499	15.186	17.011	18.568	16.522	19.687	17.063	17.84
42_NoRec	NoRec	20.316	18.392	18.949	18.31	17.605	19.609	13.493	21.367	14.802	13.58	20.361	16.116	19.586	20.762	19.384	16.159	17.395	15.682	17.528	20.642	21.228	14.797	16.008	17.216	18.454	18.723	20.212	18.365	18.201
45_NoRec	NoRec	18.332	18.331	16.717	15.433	11.902	17.105	15.097	19.097	17.268	13.654	19.477	17.045	19.403	21.287	19.899	15.514	12.34	9.533	14.493	17.199	19.211	13.765	11.723	15.623	18.259	18.108	18.422	17.093	17.138
57_NoRec	NoRec	20.938	19.359	17.67	18.593	16.547	20.424	13.105	21.211	18.781	15.534	20.23	18.808	20.808	20.224	20.967	17.567	17.589	14.45	16.038	19.389	22.003	17.495	13.801	18.025	17.719	18.877	21.008	18.127	19.57
63_NoRec	NoRec	21.368	20.877	19.236	20.743	7.81	20.726	10.298	22.654	18.199	16.688	20.596	18.647	20.138	21.602	19.848	17.634	19.055	16.633	19.319	20.583	23.082	15.27	17.133	19.389	20.096	19.999	21.335	20.07	19.763
75_NoRec	NoRec	18.631	18.796	18.742	18.176	19.642	19.989	12.806	18.045	19.098	16.438	19.673	19.873	20.364	22.991	20.825	16.182	18.779	11.25	16.911	18.199	20.733	14.136	14.537	19.326	17.685	21.594	19.784	17.655	19.597
78_NoRec	NoRec	20.588	18.217	18.445	17.185	17.449	20.436	14.734	19.971	18.41	15.014	20.328	16.115	19.941	22.918	20.935	16.214	16.156	12.879	14.586	17.655	20.844	16.092	14.338	18.085	17.482	19.604	19.788	17.636	19.719
81_NoRec	NoRec	18.303	19.146	19.045	18.285	15.199	18.272	14.443	21.534	18.85	14.627	19.379	18.177	20.669	22.194	21.266	18.418	13.149	16.814	17.999	17.427	20.963	16.142	14.934	17.517	19.12	19.853	20.054	18.258	19.14
84_NoRec	NoRec	20.409	18.986	16.92	17.242	18.01	20.367	13.112	19.135	18.743	15.694	20.835	20.05	20.089	21.954	21.02	14.271	15.778	14.585	17.413	19.135	21.066	15.075	14.025	17.375	17.598	20.368	19.286	17.688	19.878
87_NoRec	NoRec	17.317	18.402	12.291	16.748	16.792	18.98	13.299	8.27	20.398	16.722	19.102	18.215	18.695	20.171	20.83	14.828	17.754	12.245	8.142	17.637	20.826	12.948	13.054	15.798	17.264	16.147	19.429	17.664	19.388
90_NoRec	NoRec	19.461	18.409	18.687	18.012	18.642	18.875	16.562	20.87	19.942	15.317	20.62	17.508	20.203	20.483	20.65	17.615	15.256	15.654	13.537	19.207	21.829	15.486	15.391	18.39	17.653	18.397	20.418	16.821	20.397
